# Supplementary material for: Integrated Enrichment Analysis of Variants and Pathways in Genome-Wide Association Studies Indicates Central Role for IL-2 Signaling Genes in Type 1 Diabetes, and Cytokine Signaling Genes in Crohn's Disease
Source: PLOS journal article supplement (doi:10.1371/journal.pgen.1003770), 2013-10-03
Supplement: S13 (10.1371/journal.pgen.1003770.s013) [file journal.pgen.1003770.s013.pdf › journal.pgen.1003770.s013.pdf]

**Table S1. Summary of data from WTCCC studies.**

| disease  | bipolar<br>disorder | coronary<br>artery<br>disease | Crohn's<br>disease | hyper-<br>tension | rheumatoid<br>arthritis | type 1<br>diabetes | type 2<br>diabetes |
|----------|---------------------|-------------------------------|--------------------|-------------------|-------------------------|--------------------|--------------------|
| cases    | 1868                | 1926                          | 1748               | 1952              | 1860                    | 1963               | 1924               |
| controls | 2938                | 2938                          | 2938               | 2938              | 2938                    | 2938               | 2938               |
| SNPs     | 441,283             | 440,807                       | 442,001            | 441,089           | 441,079                 | 441,627            | 441,398            |

The bottom row shows the total number of SNPs for each disease after applying quality control filters, discarding additional SNPs that may exhibit genotyping errors, and after removing SNPs that show no variation in the sample (see Methods).
