# Supplementary material for: Integrated Enrichment Analysis of Variants and Pathways in Genome-Wide Association Studies Indicates Central Role for IL-2 Signaling Genes in Type 1 Diabetes, and Cytokine Signaling Genes in Crohn's Disease
Source: PLOS journal article supplement (doi:10.1371/journal.pgen.1003770), 2013-10-03
Supplement: S14 (10.1371/journal.pgen.1003770.s014) [file journal.pgen.1003770.s014]

**Table S2. Regions of the genome with moderate to strong evidence for disease risk factors under null.**

| disease | chr.  | region (Mb)   | $P_1$ | $P_2$ | candidate      |                   | PIP  | LOR (95% CI)      | MAF   |       |
|---------|-------|---------------|-------|-------|----------------|-------------------|------|-------------------|-------|-------|
|         |       |               |       |       | gene(s)        | SNP               |      |                   | ctrls | cases |
| CAD     | 9p21  | 21.82–22.12   | 1.00  | 0.00  | <i>CDKN2B</i>  | rs9632884         | 1.00 | -0.26 (0.19–0.33) | 0.522 | 0.445 |
| CD      | 1p31  | 67.31–67.57   | 1.00  | 0.06  | <i>IL23R</i>   | <b>rs11805303</b> | 1.00 | 0.25 (0.18–0.33)  | 0.318 | 0.391 |
| CD      | 2q37  | 233.74–234.04 | 1.00  | 0.01  | <i>ATG16L1</i> | <b>rs10210302</b> | 1.00 | -0.27 (0.21–0.36) | 0.481 | 0.402 |
| CD      | 5p13  | 40.24–40.53   | 1.00  | 0.43  | <i>PTGER4</i>  | <b>rs17234657</b> | 1.00 | 0.29 (0.20–0.39)  | 0.124 | 0.181 |
| CD      | 6     | MHC           | 0.51  | 0.02  | multiple       | rs9469220         | 0.48 | -0.17 (0.10–0.25) | 0.519 | 0.465 |
| CD      | 10q21 | 64.08–64.27   | 0.96  | 0.03  | <i>ZNF365</i>  | rs10995271        | 0.96 | 0.20 (0.13–0.28)  | 0.386 | 0.440 |
| CD      | 10q24 | 101.24–101.38 | 0.95  | 0.01  | <i>NKX2-3</i>  | rs7095491         | 0.95 | 0.20 (0.12–0.27)  | 0.470 | 0.527 |
| CD      | 16q12 | 49.11–49.42   | 1.00  | 0.11  | <i>NOD2</i>    | <b>rs17221417</b> | 1.00 | 0.24 (0.17–0.32)  | 0.287 | 0.356 |
| CD      | 18p11 | 12.48–12.99   | 0.94  | 0.01  | <i>PTPN2</i>   | <b>rs2542151</b>  | 0.94 | 0.24 (0.14–0.32)  | 0.163 | 0.209 |
| RA      | 1p13  | 113.85–114.32 | 1.00  | 0.00  | <i>PTPN22</i>  | <b>rs6679677</b>  | 1.00 | 0.49 (0.39–0.60)  | 0.096 | 0.169 |
| RA      | 6     | MHC           | 1.00  | 1.00  | multiple       | rs9268560         | 1.00 | -0.38 (0.31–0.46) | 0.483 | 0.306 |
| T1D     | 1p13  | 113.71–114.26 | 1.00  | 0.01  | <i>PTPN22</i>  | <b>rs6679677</b>  | 1.00 | 0.51 (0.40–0.61)  | 0.096 | 0.170 |
| T1D     | 6     | MHC           | 1.00  | 1.00  | multiple       | rs9273363         | 1.00 | 0.80 (0.72–0.87)  | 0.305 | 0.709 |
| T1D     | 12q13 | 54.36–54.97   | 0.94  | 0.00  | <i>ERBB3</i>   | rs1873914         | 0.94 | 0.22 (0.14–0.29)  | 0.414 | 0.471 |
| T1D     | 12q24 | 110.65–111.28 | 1.00  | 0.00  | <i>SH2B3</i>   | <b>rs17696736</b> | 1.00 | 0.32 (0.24–0.39)  | 0.424 | 0.505 |
| T1D     | 16p13 | 11.04–11.28   | 0.51  | 0.01  | <i>CLEC16A</i> | <b>rs12708716</b> | 0.51 | -0.20 (0.13–0.29) | 0.350 | 0.297 |
| T2D     | 10q25 | 114.58–115.00 | 1.00  | 0.01  | <i>TCF7L2</i>  | rs7901695         | 1.00 | 0.26 (0.19–0.34)  | 0.321 | 0.391 |
| T2D     | 16q12 | 52.04–52.38   | 0.77  | 0.01  | <i>FTO</i>     | rs9939973         | 0.51 | 0.14 (0.01–0.24)  | 0.428 | 0.481 |

For each region in this table, there is at least a 0.5 probability that one or more SNPs in the region is included in the multi-marker disease model ( $P_1 \geq 0.5$ ) under the null hypothesis that no pathways are enriched for disease associations. Each region is a segment containing 50 SNPs. Overlapping segments containing the same association signal are not included in this table. Table columns from left to right are: (1) disease; (2) chromosomal locus; (3) region of the genome spanned by the 50 SNPs, in Megabases; (4) posterior probability that one or more SNPs in the segment are included in the model under the null hypothesis; (5) posterior probability that 2 or more SNPs are included under the null; (6) established genes in disease pathogenesis, or most credible genes of interest, corresponding to the locus; (7) refSNP identifier of SNP in segment with largest PIP (SNP in bold corresponds exactly to SNP in [65] with the smallest  $p$ -value); (8) the PIP of that SNP; (9) posterior mean and 95% credible interval of regression coefficient  $\beta_j$ , or equivalently additive effect of minor allele count on log-odds of disease (“log-odds ratio”), in multi-marker disease model conditioned on SNP being included in model; (10) frequency of minor allele for that SNP in controls, and (11) in cases. All SNP information and genomic positions are based on Human Genome Assembly 17 (NCBI build 35).
